# Supplementary material for: Nieve en Andalucía: 60 artículos sobre Sierra Nevada
Source: PLOS journal article supplement (doi:10.1371/journal.pone.0018939), 2002-01-01

**Figure S3.** The quantile-quantile (QQ) plot of the association results for the GWAS on obesity. The genomic control inflation factor was 1.05.

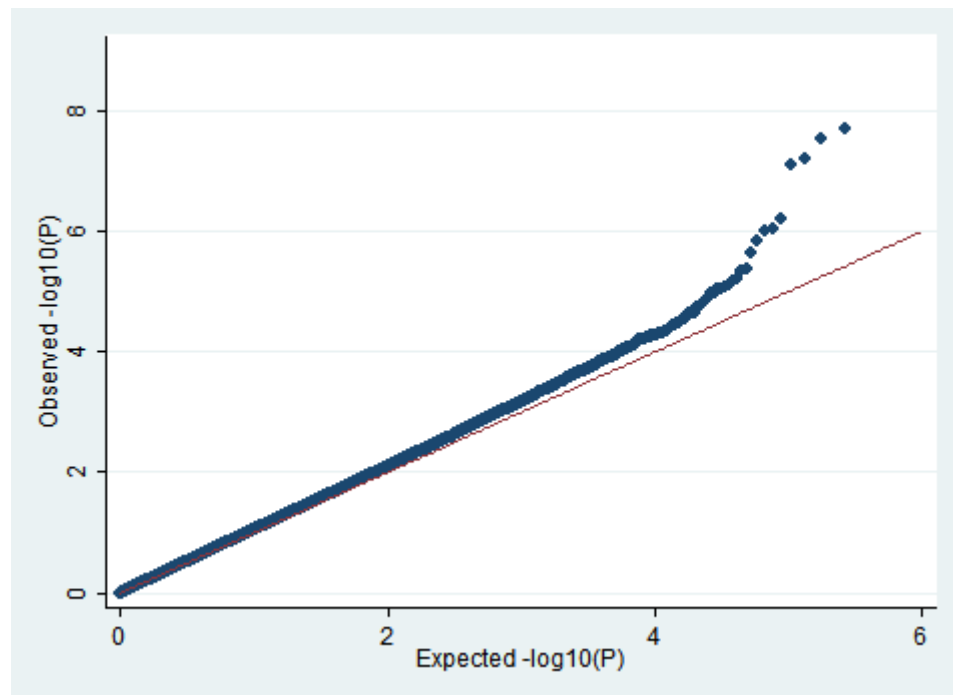

Supplement: S3 (10.1371/journal.pone.0018939.s003) [file journal.pone.0018939.s003]
